# Supplementary material for: Rumen Inoculum Enhances Cathode Performance in Single-Chamber Air-Cathode Microbial Fuel Cells
Source: Materials (Basel). 2022 Jan 5;15(1):379. doi: 10.3390/ma15010379 (PMC8746161; doi:10.3390/ma15010379)
Supplement: Supplementary file 1 [file materials-15-00379-s001.zip › materials-1496213-supplementary.pdf]

Supplementary Materials

# Rumen Inoculum Enhances Cathode Performance in Single-Chamber Air-Cathode Microbial Fuel Cells

Ignacio T. Vargas <sup>1,2,\*</sup>, Natalia Tapia <sup>1,2</sup> and John M. Regan <sup>3</sup>

<sup>1</sup> Department of Hydraulic and Environmental Engineering, Pontificia Universidad Católica de Chile, Santiago 7820436, Chile; netapia@uc.cl

<sup>2</sup> Centro de Desarrollo Urbano Sustentable (CEDEUS), Santiago 7520246, Chile

<sup>3</sup> Department of Civil and Environmental Engineering, The Pennsylvania State University, University Park, PA 16801, USA; jmr41@psu.edu

\* Correspondence: itvargas@ing.puc.cl

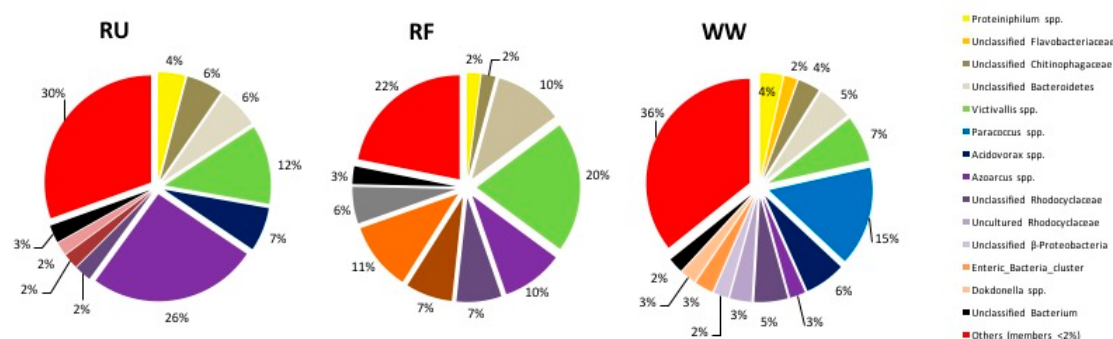

**Figure S1.** Genus-level community distribution of cathodes of rumen (RU), rumen + fumarate (RF) and wastewater (WW) reactors. Results show a shift in the frequency of *Victivallis* spp. (from 26% to 20%) and *Azoarcus* spp. (from 3% to 10%) for rumen reactors amended with fumarate.

**Citation:** Vargas, I.T.; Tapia, N.; Regan, J.M. Rumen Inoculum Enhances Cathode Performance in Single-Chamber Air-Cathode Microbial Fuel Cells. *Materials* **2022**, *15*, 379. <https://doi.org/10.3390/ma15010379>

Academic Editors: Sneha Samal and Ignazio Blanco

Received: 21 November 2021

Accepted: 31 December 2021

Published: 5 January 2022

**Publisher's Note:** MDPI stays neutral with regard to jurisdictional claims in published maps and institutional affiliations.

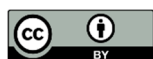

**Copyright:** © 2022 by the authors. Licensee MDPI, Basel, Switzerland. This article is an open access article distributed under the terms and conditions of the Creative Commons Attribution (CC BY) license (<https://creativecommons.org/licenses/by/4.0/>).

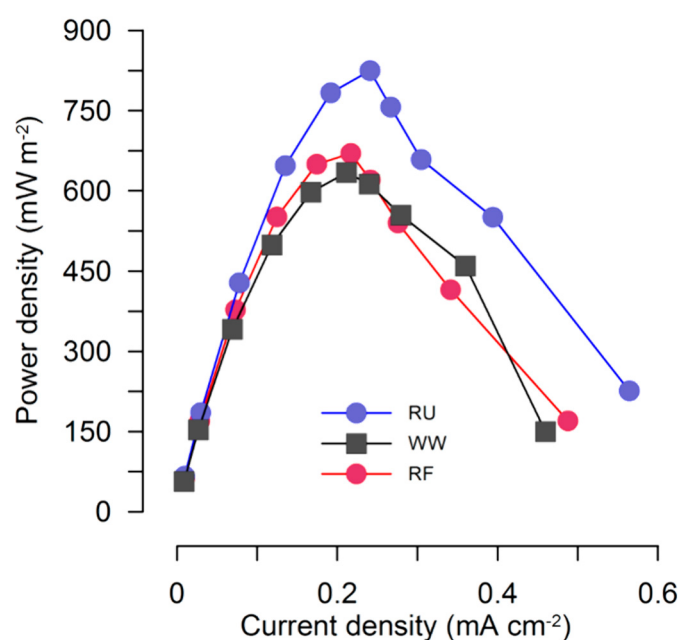

**Figure S2.** Power density curves of MFC reactors. A decrease in the maximum power density is observed in rumen reactors amended with fumarate. RU: rumen and wastewater inoculum; RF: rumen and wastewater inoculum + fumarate additions; WW: wastewater inoculum.

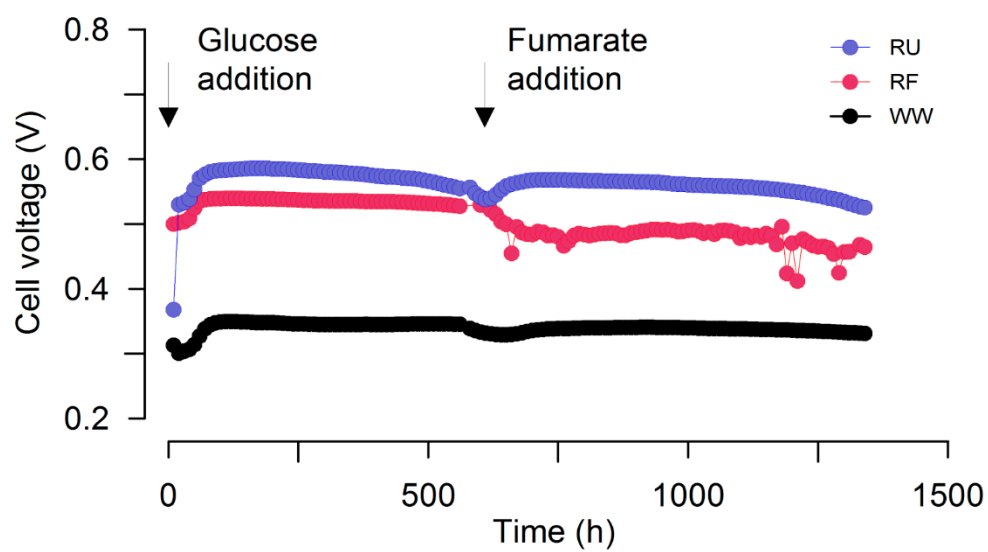

**Figure S3.** MFC reactor inoculated with rumen enrichment and amended with 60 mgL<sup>-1</sup> of fumarate (additional to the 1 gL<sup>-1</sup> of glucose) for each batch-cycle, during 60 days of operation. Results show a decrease in cell voltage after fumarate addition suggesting its role as alternative electron acceptor. RU: rumen + wastewater; RF: rumen + wastewater amended with fumarate; WW: wastewater.
